# Supplementary material for: Tumor suppressor role of sFRP-4 in hepatocellular carcinoma via the Wnt/β-catenin signaling pathway
Source: PubMed Central journal article supplement — Mol Med Rep. 2021 Mar 8;23(5):336. doi: 10.3892/mmr.2021.11975 (PMC7974405; doi:10.3892/mmr.2021.11975), 2021-03-08

Figure S1. Transfection efficiency of sFRP-4-OE and si-sFRP-4 in HCCLM3 and Huh7 cells. Transfection efficiency was determined via reverse transcription-quantitative PCR. \*\*P<0.001 vs. CON. sFRP-4, secreted frizzled-related protein 4; OE, overexpression; si, small interfering RNA; CON, blank control; NC, negative control.

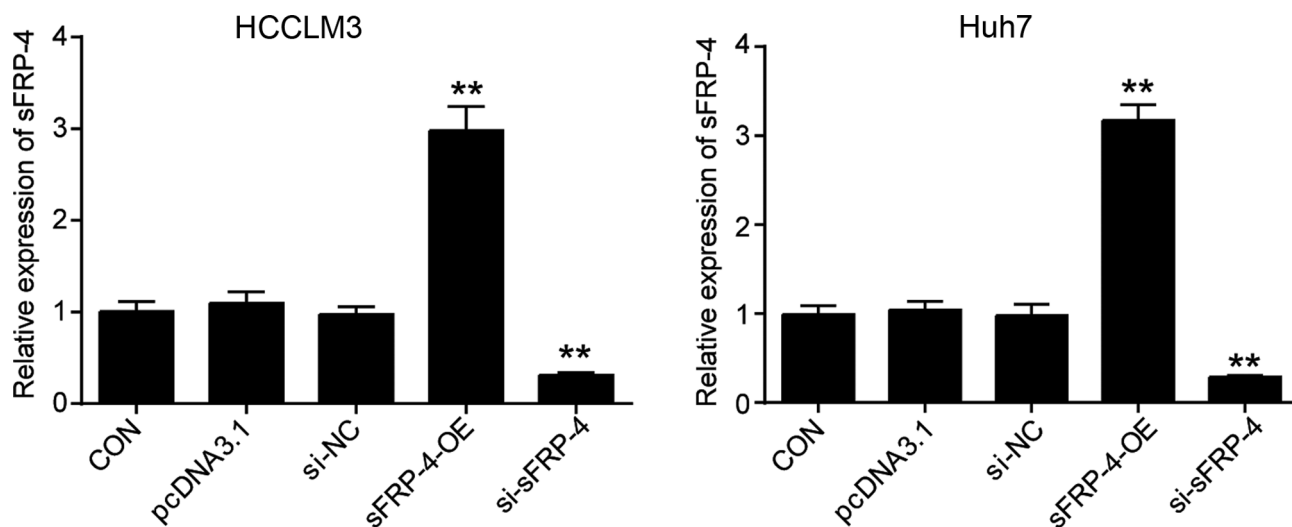

Supplement: Supplementary_Data.pdf [file Supplementary_Data.pdf]
